# Supplementary material for: Systematic discovery of genetic modulation by Jumonji histone demethylases in Drosophila
Source: PubMed Central journal article supplement (PMC5507883; doi:10.1038/s41598-017-05004-w), 2017-07-12
Supplement: 41598_2017_5004_MOESM2_ESM.pdf [file 41598_2017_5004_MOESM2_ESM.pdf]

Supplemental Figures for

**Systematic discovery of genetic modulation by Jumonji histone demethylases in *Drosophila***

Nevine A. Shalaby<sup>1,4</sup>, Raheel Sayed<sup>1</sup>, Qiao Zhang<sup>1</sup>, Shane Scoggin<sup>1</sup>, Susan Eliazer<sup>1</sup>, Adrian Rothenfluh<sup>2,3,5,+</sup> and Michael Buszczak<sup>1,+</sup>

<sup>1</sup>Department of Molecular Biology, University of Texas Southwestern Medical Center, Dallas, TX, 75390, USA

<sup>2</sup>Department of Psychiatry, and <sup>3</sup>Neuroscience Program, University of Texas Southwestern Medical Center, Dallas, TX, 75390, USA

<sup>4</sup>Institute for Biology, Freie Universität Berlin, 14195 Berlin, Germany

<sup>5</sup>Department of Psychiatry, Molecular Medicine Program, University of Utah, Salt Lake City, Utah, 84112, USA

<sup>+</sup>M.B. and A.R. are co-senior authors.

**A**

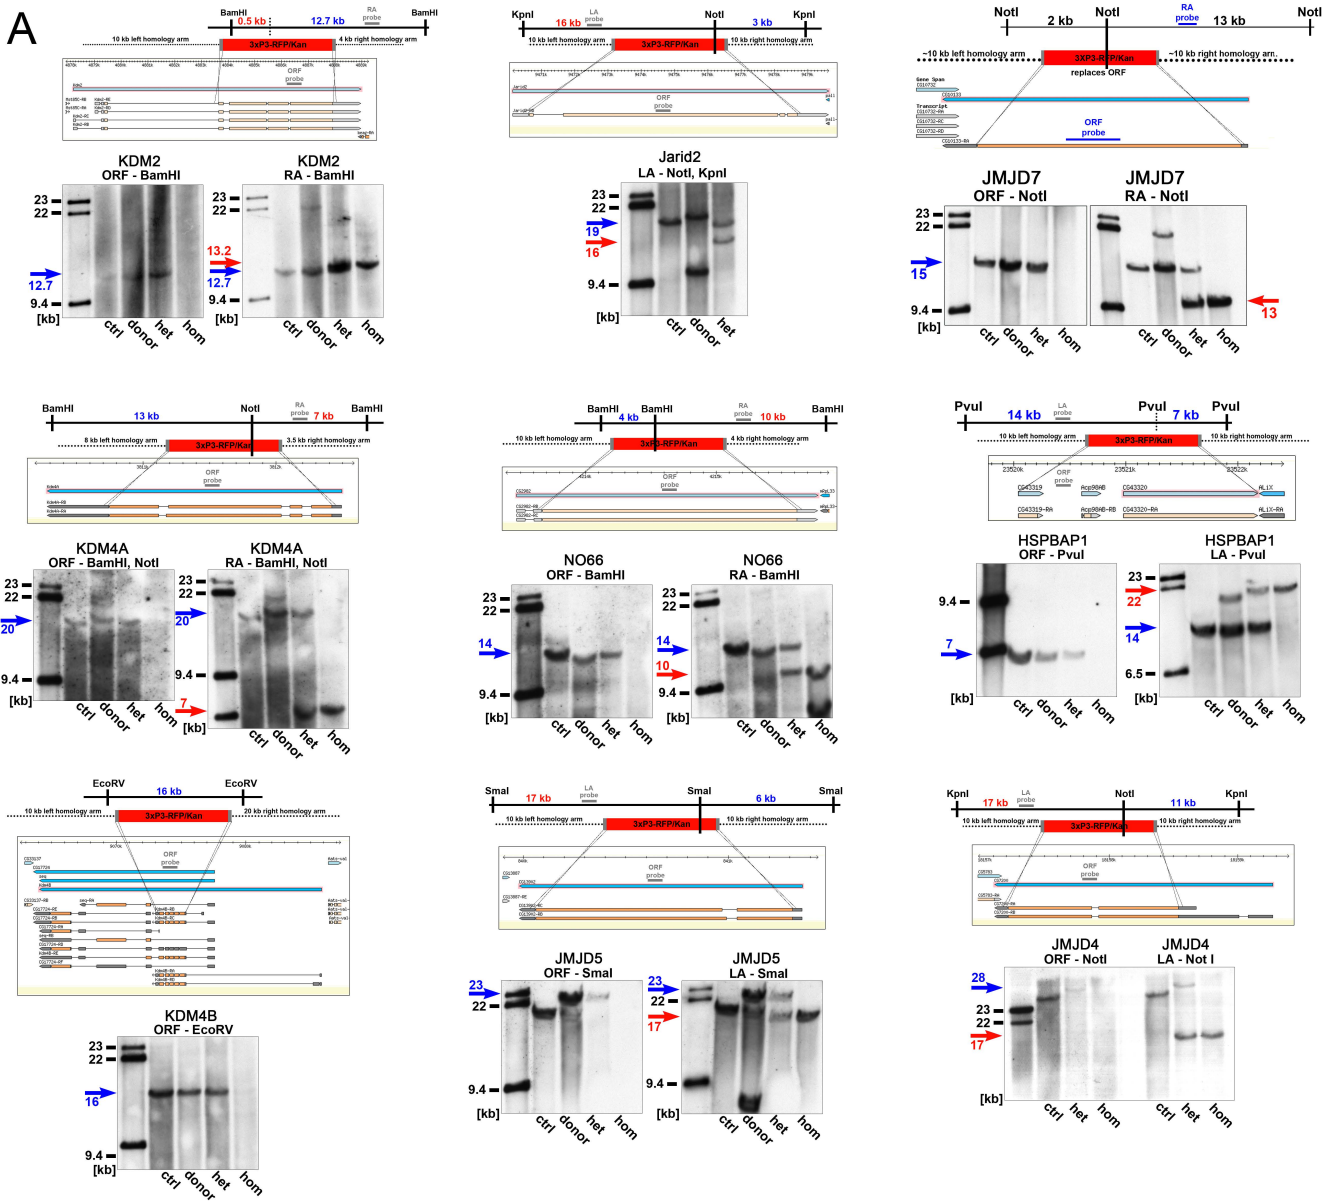

**B**

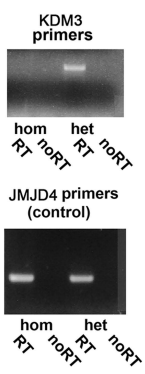

**C**

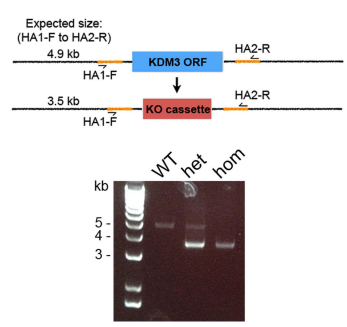

## Supplemental Figure 1. Design and verification of *JmjC*<sup>KO</sup> alleles.

(A) Schematic of each knock-in cassette with approximate lengths of the homology arms, restriction digest strategy and Southern blot results for nine *JmjC* alleles generated using ends-out homologous recombination. A restriction digest was designed to differentiate between the genomic locus with the ORF and presence of the knock-in cassette. The name of the gene is indicated in each panel. Blue arrows point to wildtype chromosomes and red arrows point to knockout chromosomes. ORF (open reading frame), RA (right arm), LA (left arm), ctrl (control, *y w*), donor (flies containing the P[acman] cassette in the landing site), het (heterozygous knockout), hom (homozygous knockout). Note: *HSPBAP1* was formerly denoted as *CG12879*. However, since the project started, recent updates to the annotation show that the region can be subdivided into three genes; *CG43319*, *Acp98AB* and *CG43320*. The knock-in cassette was designed to remove all three genes. *CG43320* is the only ORF that contains the JmjC domain. (B) RT-PCR analysis of the *KDM3*<sup>KO</sup> mutant generated using ends-out homologous recombination. RNA was isolated from *KDM3*<sup>KO</sup> flies and an RT reaction was performed followed by PCR using the indicated primers. (+) indicates the presence of reverse transcriptase enzyme in the RT reaction, while (-) indicates the absence of enzyme which was used to control for DNA contamination. *JMJD4* primers were used to control for the presence of template in all reactions. (C) Crispr/Cas9 strategy designed to remove *KDM3* ORF and replace it with *dsRed* under control of the *eyeless* promoter. The primer pair used to verify the successful replacement of the gene (HA1-F and HA2-R) results in a 4.9kb fragment in wildtype and 3.5kb fragment in the KO line. An agarose gel shows the expected fragment sizes in WT (*wild type*), heterozygous (*KDM3*<sup>KO/+</sup>) and homozygous (*KDM3*<sup>KO/KDM3</sup><sup>KO</sup>).

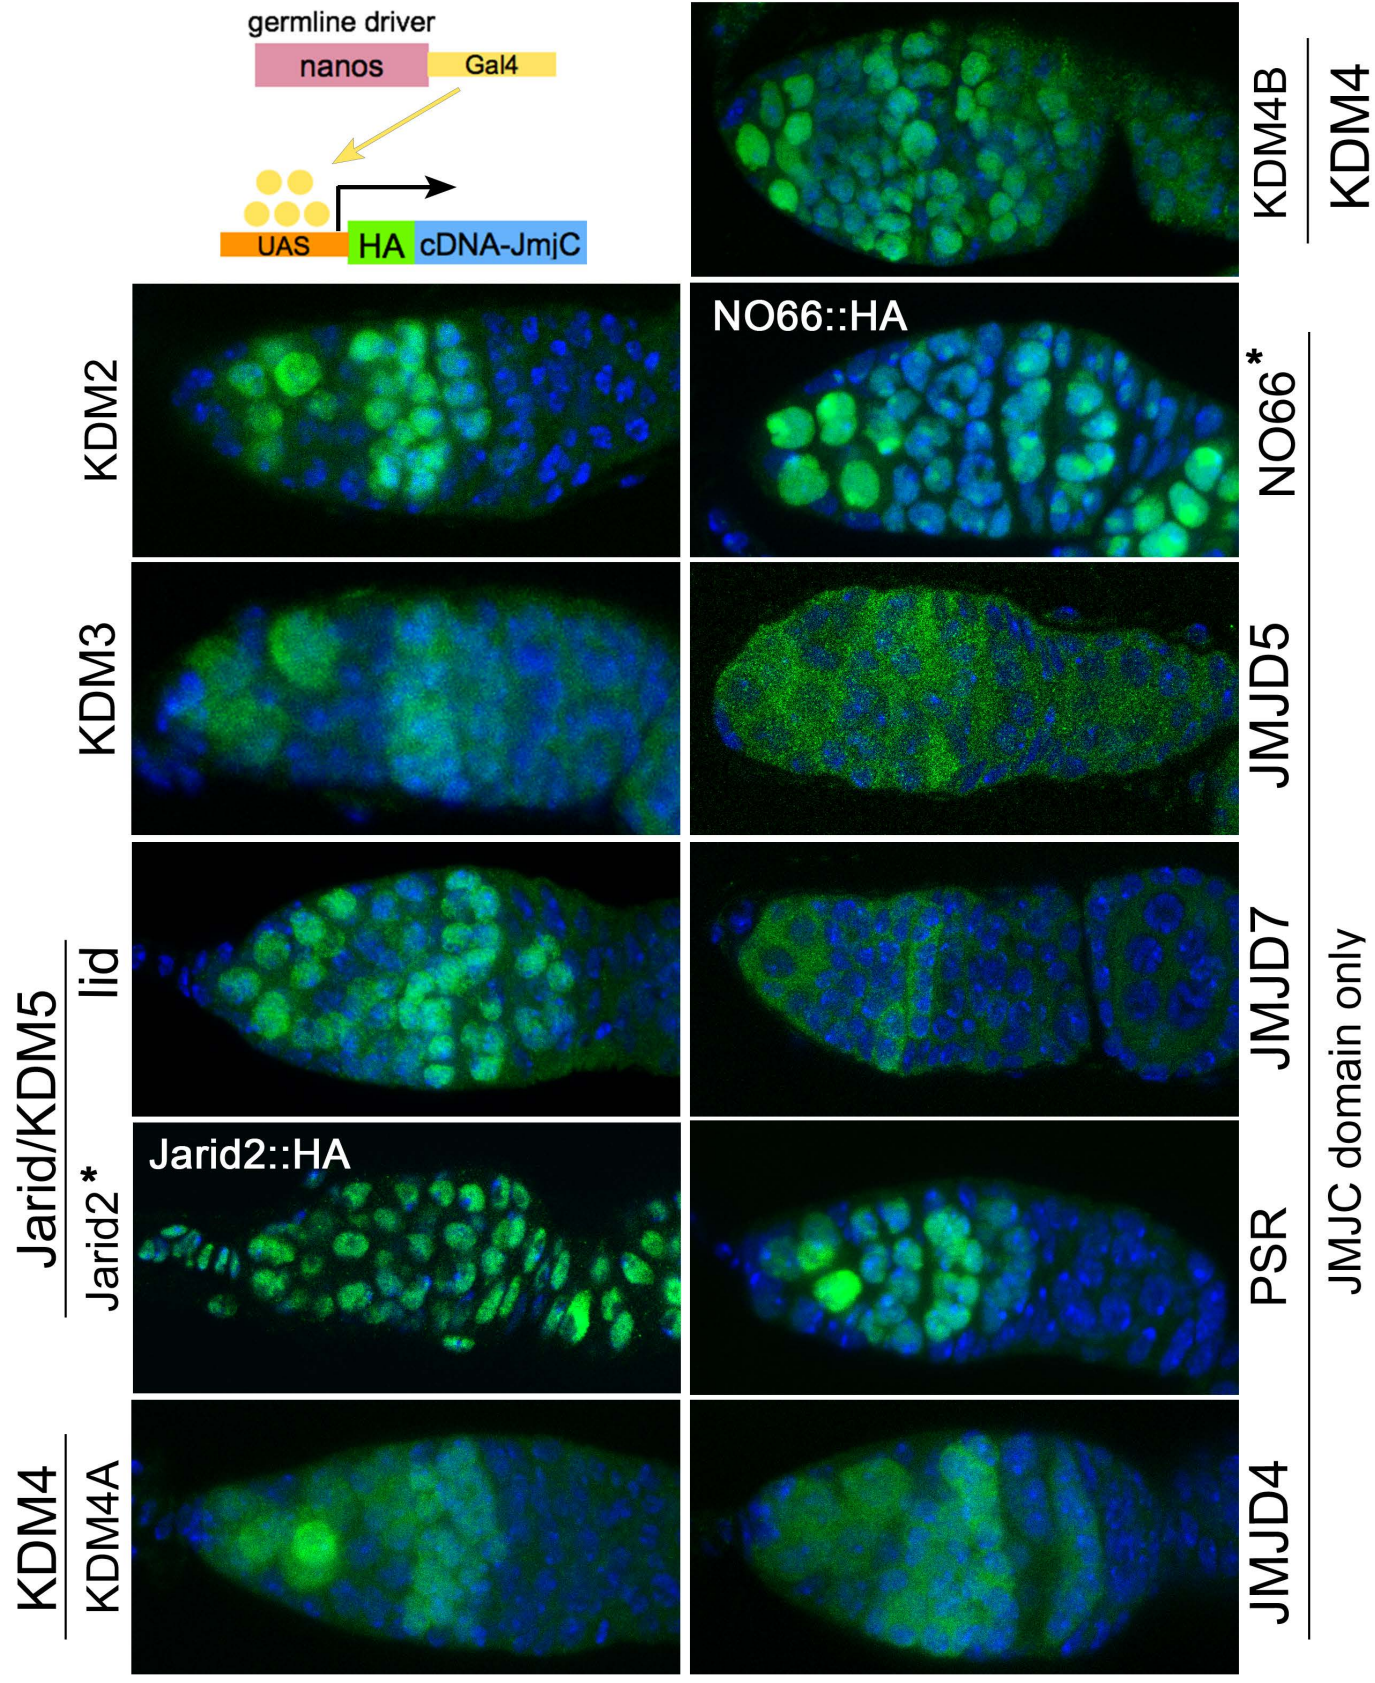

**Supplemental Figure 2. Subcellular localization of *Drosophila* JmjC proteins in the ovary.** The germline driver, *nanos-Gal4* (*nos*), was crossed to *UAS-HA::JmjC* lines. Ovaries were dissected and stained with anti-HA (green) and counterstained with DAPI for DNA (blue). All panels are images of the germarium of the *Drosophila* ovary. In two cases (\*), the genomic tags were used since they exhibited high expression in the germaria: *Jarid2::HA* and *NO66::HA*. In a single case (*KDM4B*) *nanos-Gal4* was crossed to untagged *KDM4B* (*UAS-KDM4B*) and ovaries were dissected and stained with anti-*KDM4B* (green) and DAPI (blue).

overgrowth eye phenotype:  enhanced  suppressed

| Genotype                            | No. of flies | No. enhanced | No. suppressed |   |
|-------------------------------------|--------------|--------------|----------------|---|
| <i>GMR&gt;Yki<sup>S168A</sup>/+</i> | 22           | 3            | 0              |   |
| <i>KDM2<sup>KO</sup></i>            | 25           | 0            | 0              |   |
| <i>KDM3<sup>KO</sup></i>            | 22           | 0            | 0              |   |
| <i>KDM4A<sup>KO</sup></i>           | 35           | 0            | 0              |   |
| <i>KDM4B<sup>KO</sup></i>           | 30           | 0            | 0              |   |
| <i>UTX<sup>Δ</sup></i>              | 12           | 12           | 0              | * |
| <i>lid<sup>10424</sup></i>          | 16           | 3            | 0              |   |
| <i>Jarid2<sup>KO</sup></i>          | 17           | 0            | 0              |   |
| <i>NO66<sup>KO</sup></i>            | 29           | 0            | 15             | * |
| <i>JMJD5<sup>KO</sup></i>           | 22           | 0            | 16             | * |
| <i>JMJD7<sup>KO</sup></i>           | 21           | 0            | 0              |   |
| <i>HSPBAP1<sup>KO</sup></i>         | 31           | 5            | 0              |   |
| <i>PSR<sup>FM1</sup></i>            | 26           | 0            | 0              |   |
| <i>JMJD4<sup>KO</sup></i>           | 28           | 0            | 0              |   |

All genotypes have one copy of the mutant and one copy of *GMR>Yki<sup>S168A</sup>*

**Supplemental Figure 3. Quantification of phenotypes in Figure 6A-C.**

Number of enhancers and suppressors for each cross, containing one copy of *GMR>Yki<sup>S168A</sup>* and one copy of the mutant. *UTX<sup>A</sup>/+* significantly enhanced the eye overgrowth phenotype, while *NO66<sup>KO</sup>/+* and *JMJD5<sup>KO</sup>/+* suppressed it (P<0.05 – Unpaired T.Test).

**A**

| Genotype                          | mild | severe |
|-----------------------------------|------|--------|
| <i>C765&gt;Smo<sup>5A/+</sup></i> | 43   | 7      |
| <i>KDM2<sup>KO</sup></i>          | 28   | 4      |
| <i>KDM3<sup>KO</sup></i>          | 35   | 0      |
| <i>KDM4A<sup>KO</sup></i>         | 17   | 25 *   |
| <i>KDM4B<sup>KO</sup></i>         | 21   | 20 *   |
| <i>UTX<sup>Δ</sup></i>            | 34   | 4      |
| <i>lid<sup>10424</sup></i>        | 38   | 3      |
| <i>Jarid2<sup>KO</sup></i>        | 12   | 6      |
| <i>NO66<sup>KO</sup></i>          | 16   | 2      |
| <i>JMJD5<sup>KO</sup></i>         | 31   | 5      |
| <i>JMJD7<sup>KO</sup></i>         | 14   | 5      |
| <i>HSPBAP1<sup>KO</sup></i>       | 28   | 4      |
| <i>PSR<sup>FM1</sup></i>          | 52   | 22     |
| <i>JMJD4<sup>KO</sup></i>         | 42   | 6      |

All genotypes have one copy of the mutant and one copy of *C765>Smo<sup>5A</sup>*

**B**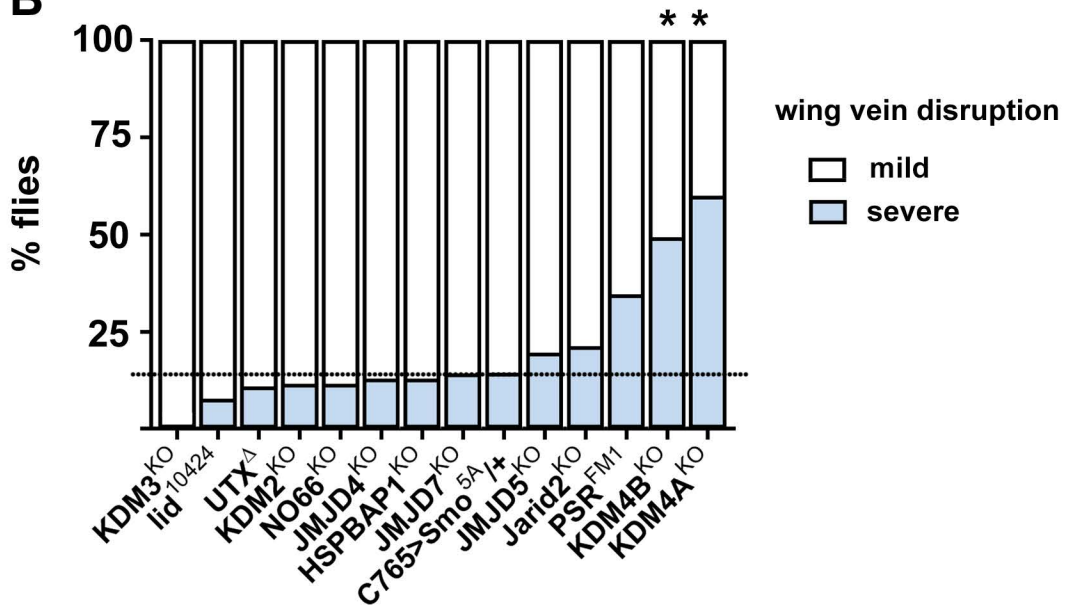



**Supplemental Figure 4. Quantification of phenotypes in Figure 6D-H.**

**(A)** Number of enhancers and suppressors for each cross, containing one copy of  $C765>Smo^{5A}$  and one copy of the mutant.  $KDM3^{KO/+}$  yielded no progeny with severe vein disruption,  $PSR^{FM1/+}$  showed a tendency towards enhancement, while  $KDM4A^{KO/+}$  and  $KDM4B^{KO/+}$  yielded a significantly higher percentage of flies exhibiting severe vein disruption ( $P < 0.05$  – Fisher exact test, with Bonferroni correction). **(B)** Percentage of severe wing vein disruption (blue) in each cross, containing one copy of  $C765>Smo^{5A}$  and one copy of the mutant.
